# Supplementary material
Source: HighWire-hosted journal article supplement (https://bmjopen.bmj.com/content/9/3/e025460)
Supplement: inline-supplementary-material-1 [file inline-supplementary-material-1.pdf]

## **Appendices**

Appendix 1. GMC categorised speciality (n=71) & sub-speciality curricula

Appendix 2. Scoping review competency mapping

Appendix 3. Curricula keyword search & domain mapping

## Appendix 1. GMC categorised speciality (n=71) & sub-speciality curricula

All sourced from the GMC website(67) and analysed on 31/05/17. PDF binder of all curricula downloaded and analysed on this date is available upon request.

### Royal College of Anaesthetists

- Anaesthetics
  - ↳ Pre-hospital emergency medicine
- Intensive care medicine
  - ↳ Pre-hospital emergency medicine

### Royal College of Emergency Medicine

- Emergency medicine
  - ↳ Paediatric emergency medicine
  - ↳ Pre-hospital emergency medicine

### Royal College of General Practitioners

- General practice

### Royal College of Obstetricians and Gynaecologists

- Obstetrics and gynaecology
  - ↳ Gynaecological oncology
  - ↳ Maternal and fetal medicine
  - ↳ Reproductive medicine
  - ↳ Urogynaecology

### Faculty of Occupational Medicine

- Occupational medicine

### Royal College of Ophthalmologists

- Ophthalmology

### Royal College of Paediatrics and Child Health

- Paediatrics
  - ↳ Child mental health
  - ↳ Community child health
  - ↳ Neonatal medicine
  - ↳ Paediatric allergy, immunology and infectious diseases
  - ↳ Paediatric clinical pharmacology and therapeutics
  - ↳ Paediatric diabetes and endocrinology
  - ↳ Paediatric emergency medicine
  - ↳ Paediatric gastro-enterology, hepatology and nutrition
  - ↳ Paediatric inherited metabolic medicine
  - ↳ Paediatric intensive care medicine
  - ↳ Paediatric nephrology
  - ↳ Paediatric neurodisability
  - ↳ Paediatric neurology
  - ↳ Paediatric oncology
  - ↳ Paediatric palliative medicine
  - ↳ Paediatric respiratory medicine
  - ↳ Paediatric rheumatology

### Royal College of Pathologists

- Chemical pathology
  - ↳ Metabolic medicine
- Diagnostic neuropathology
- Forensic histopathology
- Histopathology
  - ↳ Cytopathology
- Medical microbiology
- Medical virology
- Paediatric and perinatal pathology

### Faculty of Pharmaceutical Medicine

- Pharmaceutical medicine

### Joint Royal Colleges of Physicians Training Board

- Acute internal medicine
  - ↳ Pre-hospital emergency medicine
  - ↳ Stroke medicine
- Allergy
- Audio vestibular medicine
- Aviation and space medicine
- Cardiology
  - ↳ Stroke medicine
- Clinical genetics
- Clinical neurophysiology
- Clinical pharmacology and therapeutics
  - ↳ Stroke medicine
- Dermatology
- Endocrinology and diabetes mellitus
- Gastro-enterology
  - ↳ Hepatology
- General (internal) medicine
  - ↳ Metabolic medicine
  - ↳ Stroke medicine
- Genito-urinary medicine
- Geriatric medicine
  - ↳ Stroke medicine
- Haematology
- Immunology
- Infectious diseases
- Medical oncology
- Medical ophthalmology
- Neurology
  - ↳ Stroke medicine
- Nuclear medicine
- Paediatric cardiology
- Palliative medicine
- Rehabilitation medicine
  - ↳ Stroke medicine
- Renal medicine
- Respiratory medicine
- Rheumatology
- Sport and exercise medicine
- Tropical medicine

### Royal College of Psychiatrists

- General psychiatry
  - ↳ Liaison psychiatry
  - ↳ Rehabilitation psychiatry
  - ↳ Substance misuse psychiatry
- Child and adolescent psychiatry
- Forensic psychiatry
- Old age psychiatry
  - ↳ Liaison psychiatry
- Psychiatry of learning disability
- Medical psychotherapy

### Faculty of Public Health

- Public health medicine

### Royal College of Radiologists

- Clinical oncology
- Clinical radiology
  - ↳ Interventional radiology

### Faculty of Sexual and Reproductive Healthcare

- Community sexual and reproductive health

### Joint Committee on Surgical Training

- Cardio-thoracic surgery
  - ↳ Congenital cardiac surgery
- General surgery
- Neurosurgery
- Oral and maxillo-facial surgery
- Otolaryngology
- Paediatric surgery
- Plastic surgery
- Trauma and orthopaedic surgery
- Urology
- Vascular surgery

### Additional Curricula Identified via the GMC Website:

- Foundation program (A1)
- Broad Based Training (A2)
- Core Medical Training (A3)
- Core Psychiatry Training (A4)
- Core Surgical Training (A5)
- Acute Care Common Stem (A6)

## Training structure for UK based clinicians[A7]

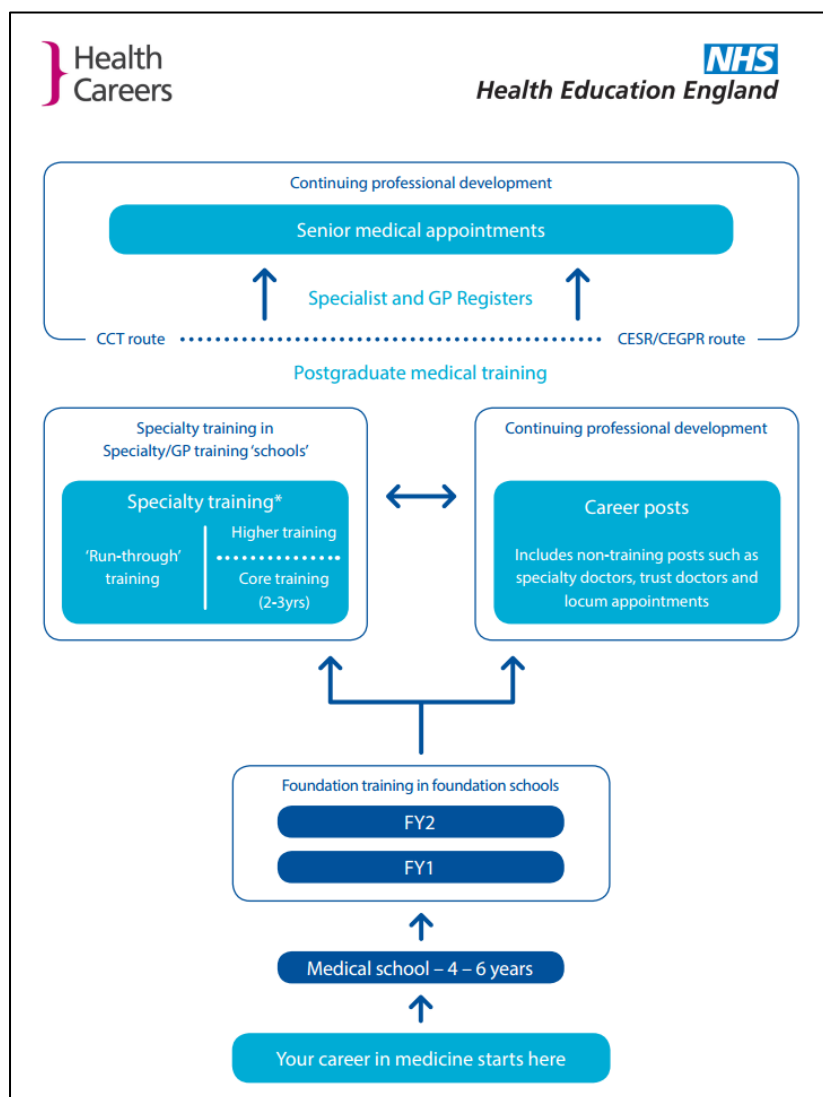

## Appendix 1 References

- A1. The Foundation Programme. FP Curriculum 2016. 2017.<http://www.foundationprogramme.nhs.uk/pages/curriculum-eportfolio/curriculum-assessment/fp-2016> (accessed 14 Jul 2017).
- A2. GMC. Broad Based Training. 2017.<http://www.gmc-uk.org/education/14310.asp> (accessed 14 Jul 2017).
- A3. GMC. Core Medical Training (CMT). 2017.<http://www.gmc-uk.org/education/24936.asp> (accessed 14 Jul 2017).
- A4. GMC. General psychiatry curriculum. 2017.[http://www.gmc-uk.org/education/general\\_psychiatry.asp](http://www.gmc-uk.org/education/general_psychiatry.asp) (accessed 14 Jul 2017).
- A5. ISCP. The Syllabus. 2017.[https://www.iscp.ac.uk/curriculum/surgical/surgical\\_syllabus\\_list.aspx](https://www.iscp.ac.uk/curriculum/surgical/surgical_syllabus_list.aspx) (accessed 14 Jul 2017).
- A6. GMC. Acute Care Common Stem (ACCS). 2017.<http://www.gmc-uk.org/education/24935.asp> (accessed 14 Jul 2017).
- A7. Health Careers. UK medical education and training framework.

## **Appendix 2. Scoping review competency mapping**

### **KEY**

PG: postgraduate. UG: undergraduate. In the mapping process, a tick symbol (✓) indicates that the document maps to an IMIA domain with no specification of skill level. Umbrella terms such as 'core informatics skills' were not mapped as they provided no specifics of their included contents. Competencies were annotated with a 'C' to indicate a 'core' skill where the curricula made specific mention to a baseline knowledge level or indicated healthcare IT professional skill levels. Where competencies described domains as 'fundamental', e.g. the fundamentals of computer science, this was not deemed to be a core skill unless explicitly stated. Annotation with an 'S' indicates a 'specialist' skill e.g. artificial intelligence systems. If the document indicated a mix of skill levels that appeared in one IMIA domain it was mapped with () e.g. (S) indicates that in the document standard and specialist skills were identified in the corresponding IMIA domain. If the competencies included aspects of computer science such as programming or software design it was assumed that basic IT skills were a required core competency.

| Reference       |                | (42)                                  | (47)                      | (45)                      | (24)                               | (44)                                                      | (41)                      | (48)                      | (46)                      | (32)                      | (34)                      | (49)                                    |
|-----------------|----------------|---------------------------------------|---------------------------|---------------------------|------------------------------------|-----------------------------------------------------------|---------------------------|---------------------------|---------------------------|---------------------------|---------------------------|-----------------------------------------|
| Curriculum Aim  |                | Whole:<br>Generic workforce<br>skills | Whole:<br>PG HI<br>Degree | Whole:<br>PG HI<br>Degree | Whole: Generic workforce<br>skills | CHI competency<br>categories:<br>Generic workforce skills | Whole:<br>PG HI<br>Degree | Whole:<br>PG HI<br>Degree | Whole:<br>PG HI<br>Degree | Whole:<br>PG HI<br>Degree | Whole:<br>PG HI<br>Degree | HI User:<br>Generic workforce<br>skills |
| IMIA+<br>Domain | Skill<br>Level |                                       |                           |                           |                                    |                                                           |                           |                           |                           |                           |                           |                                         |
| 1               | +              |                                       | ✓                         |                           |                                    | ✓                                                         | ✓                         |                           |                           | ✓C                        |                           |                                         |
| 2               | ++             | ✓                                     |                           | ✓                         | ✓C                                 | ✓                                                         |                           | ✓                         |                           |                           | ✓                         |                                         |
| 3               | ++             | ✓                                     | ✓                         | ✓C                        | ✓C                                 | ✓                                                         | ✓                         | ✓                         | ✓                         | ✓                         | ✓C                        |                                         |
| 4               | ++             | ✓                                     | ✓                         | ✓C                        | ✓C                                 | ✓                                                         | ✓                         | ✓                         | ✓                         | ✓C                        |                           | ✓C                                      |
| 5               | ++             | ✓                                     | ✓                         | ✓C                        | ✓C                                 | ✓                                                         | ✓                         | ✓                         | ✓                         | ✓C                        | ✓C                        | ✓C                                      |
| 6               | +              | ✓                                     | ✓                         | ✓C                        | ✓C                                 | ✓                                                         | ✓                         | ✓                         | ✓                         | ✓C                        | ✓                         | ✓C                                      |
| 7               | +++            |                                       | ✓(S)                      | ✓(C)                      | ✓C                                 | ✓                                                         | ✓                         | ✓                         | ✓(S)                      | ✓(C/S)                    | ✓C                        | ✓C                                      |
| 8               | +              |                                       | ✓                         | ✓                         | ✓C                                 | ✓                                                         | ✓                         | ✓                         | ✓(S)                      | ✓C                        | ✓                         | ✓                                       |
| 9               | +              | ✓                                     | ✓                         | ✓C                        | ✓C                                 | ✓                                                         | ✓                         | ✓                         | ✓                         | ✓C                        | ✓C                        | ✓C                                      |
| 10              | +              | ✓                                     | ✓                         | ✓                         | ✓C                                 | ✓(S)                                                      | ✓                         |                           | ✓                         | ✓S                        | ✓(C)                      | ✓(S)                                    |
| 11              | +              |                                       | ✓                         | ✓C                        | ✓C                                 | ✓                                                         |                           | ✓                         | ✓(S)                      | ✓C                        | ✓C                        | ✓C                                      |
| 12              | +              | ✓                                     | ✓(S)                      | ✓(C)                      | ✓C                                 | ✓                                                         | ✓                         | ✓                         | ✓(S)                      | ✓C                        | ✓(C)                      | ✓C                                      |
| 13              | +              |                                       | ✓                         |                           | ✓C                                 | ✓S                                                        | ✓                         | ✓                         |                           | ✓C                        | ✓                         | ✓S                                      |
| 14              | +              |                                       | ✓                         |                           | ✓C                                 | ✓(S)                                                      |                           | ✓                         | ✓                         | ✓(C/S)                    | ✓(C)                      | ✓C                                      |
| 15              | +++            |                                       |                           |                           |                                    | ✓S                                                        | ✓                         | ✓                         |                           | ✓S                        | ✓C                        | ✓S                                      |
| 16              | +              |                                       | ✓S                        |                           | ✓C                                 | ✓                                                         | ✓                         | ✓                         |                           | ✓S                        | ✓C                        | ✓C                                      |
| 17              | +              |                                       |                           |                           | ✓C                                 | ✓                                                         | ✓                         |                           |                           | ✓C                        | ✓C                        |                                         |
| 18              | +++            | ✓                                     | ✓                         |                           | ✓C                                 | ✓                                                         |                           |                           |                           | ✓C                        | ✓                         |                                         |
| 19              | +++            | ✓                                     | ✓(S)                      | ✓(C)                      | ✓C                                 | ✓                                                         | ✓                         | ✓                         | ✓(S)                      | ✓(C/S)                    | ✓(C)                      | ✓(C)                                    |
| 20              | +              |                                       | ✓                         | ✓                         |                                    | ✓                                                         | ✓                         | ✓                         | ✓                         | ✓                         | ✓C                        | ✓C                                      |
| 21              | +              |                                       |                           | ✓C                        | ✓C                                 | ✓                                                         |                           | ✓                         | ✓                         | ✓C                        | ✓(C)                      | ✓                                       |
| 22              | +++            |                                       |                           |                           | ✓C                                 | ✓                                                         |                           |                           |                           | ✓                         | ✓                         | ✓S                                      |
| 23              | +              | ✓                                     |                           |                           | ✓C                                 | ✓                                                         | ✓                         |                           |                           | ✓S                        |                           | ✓C                                      |
| 24              | +              |                                       | ✓S                        | ✓                         | ✓C                                 | ✓                                                         | ✓                         | ✓                         | ✓(S)                      | ✓S                        | ✓                         | ✓(C)                                    |
| 25              | +              |                                       | ✓                         | ✓C                        | ✓C                                 | ✓                                                         | ✓                         | ✓                         | ✓                         | ✓C                        | ✓C                        |                                         |
| 26              | ++             | ✓C                                    | ✓                         | ✓                         | ✓C                                 | ✓                                                         | ✓                         | ✓                         | ✓                         | ✓C                        | ✓C                        | ✓C                                      |
| 27              | +++            |                                       | ✓                         | ✓                         | ✓C                                 | ✓(S)                                                      | ✓                         | ✓                         | ✓(S)                      | ✓C                        | ✓(C)                      | ✓(S)                                    |
| 28              | +++            |                                       |                           | ✓                         |                                    | ✓S                                                        |                           | ✓                         | ✓S                        | ✓C                        | ✓C                        | ✓S                                      |
| 29              | +++            |                                       | ✓                         | ✓                         |                                    | ✓S                                                        | ✓                         | ✓                         | ✓                         | ✓S                        | ✓                         | ✓S                                      |
| 30              | +++            |                                       | ✓(S)                      | ✓                         | ✓C                                 | ✓                                                         | ✓                         | ✓                         | ✓(S)                      | ✓C                        | ✓C                        | ✓                                       |
| 31              | +              |                                       |                           | ✓                         |                                    | ✓                                                         | ✓                         | ✓                         | ✓(S)                      | ✓C                        | ✓C                        | ✓                                       |
| 32              | +              |                                       | ✓S                        |                           | ✓C                                 | ✓                                                         |                           | ✓                         | ✓                         | ✓(S)                      | ✓(C)                      | ✓(S)                                    |
| 33              | +++            | ✓                                     | ✓S                        | ✓                         |                                    |                                                           | ✓                         |                           | ✓                         | ✓C                        | ✓C                        | ✓S                                      |
| 34              | +++            |                                       |                           | ✓(S)                      |                                    | ✓                                                         | ✓                         |                           | ✓(S)                      | ✓C                        |                           | ✓(C)                                    |
| 35              | +              | ✓                                     | ✓(S)                      | ✓                         | ✓C                                 | ✓                                                         | ✓                         |                           | ✓(S)                      | ✓                         | ✓C                        | ✓(C)                                    |
| 36              | +++            |                                       |                           |                           | ✓C                                 | ✓                                                         |                           |                           |                           |                           |                           |                                         |
| 37              | +++            |                                       | ✓S                        |                           | ✓C                                 | ✓                                                         |                           |                           |                           |                           | ✓C                        | ✓S                                      |
| 38              | +++            |                                       | ✓                         | ✓(S)                      |                                    |                                                           | ✓                         |                           | ✓S                        | ✓(S)                      | ✓(C)                      | ✓S                                      |
| 39              | +++            |                                       |                           |                           |                                    |                                                           | ✓                         |                           |                           | ✓(S)                      | ✓                         | ✓                                       |
| 40              | +++            |                                       |                           |                           |                                    |                                                           |                           |                           |                           |                           |                           |                                         |
| 41              | +++            |                                       |                           |                           |                                    |                                                           |                           |                           |                           |                           |                           |                                         |
| 42              | +++            |                                       |                           |                           |                                    |                                                           |                           |                           |                           |                           |                           |                                         |
| 43              | +++            |                                       |                           |                           |                                    |                                                           |                           |                           |                           |                           |                           |                                         |
| 44              | +++            |                                       |                           | ✓                         |                                    | ✓S                                                        |                           |                           |                           | ✓                         | ✓C                        | ✓(S)                                    |
| 45              | +++            |                                       |                           |                           | ✓C                                 |                                                           | ✓                         | ✓                         |                           | ✓S                        |                           |                                         |
| 46              | N/A            |                                       | ✓S                        |                           |                                    |                                                           |                           |                           |                           |                           |                           |                                         |
| 47              | N/A            |                                       |                           | ✓                         |                                    |                                                           |                           |                           |                           |                           |                           | ✓                                       |
| 48              | N/A            |                                       |                           |                           |                                    | ✓                                                         |                           |                           |                           | ✓                         |                           |                                         |

| Reference       |                | (50)                                              | (36)                                   | (41)                      | (35)                    | (38)                               | (43)                          | (33)                   | (31)                               | (39)                   | (40)                               |
|-----------------|----------------|---------------------------------------------------|----------------------------------------|---------------------------|-------------------------|------------------------------------|-------------------------------|------------------------|------------------------------------|------------------------|------------------------------------|
| Curriculum Aim  |                | Whole:<br>University short-<br>course for UG & PG | Whole: EHR generic<br>workforce skills | Whole:<br>HI Subspecialty | Whole:<br>HI Fellowship | Whole: Generic<br>workforce skills | Whole:<br>HI<br>Professionals | Whole:<br>PG HI Degree | Whole: Generic<br>workforce skills | Whole:<br>PG HI Degree | Whole: Introductory<br>HI training |
| IMIA+<br>Domain | Skill<br>Level |                                                   |                                        |                           |                         |                                    |                               |                        |                                    |                        |                                    |
| 1               | +              | ✓                                                 |                                        | ✓C                        |                         |                                    |                               | ✓C                     |                                    | ✓                      | ✓C                                 |
| 2               | ++             | ✓                                                 |                                        | ✓                         | ✓C                      | ✓C                                 |                               | ✓(C)                   | ✓C                                 |                        | ✓C                                 |
| 3               | ++             | ✓C                                                | ✓C                                     | ✓                         |                         |                                    | ✓C                            | ✓C                     | ✓C                                 | ✓                      | ✓C                                 |
| 4               | ++             | ✓(C)                                              | ✓C                                     | ✓                         | ✓(C)                    |                                    | ✓C                            | ✓C                     | ✓C                                 |                        | ✓C                                 |
| 5               | ++             | ✓                                                 | ✓C                                     | ✓(C)                      | ✓                       | ✓C                                 | ✓C                            | ✓C                     | ✓C                                 | ✓                      | ✓C                                 |
| 6               | +              | ✓C                                                |                                        | ✓                         | ✓                       |                                    | ✓C                            | ✓C                     | ✓C                                 | ✓                      | ✓C                                 |
| 7               | +++            |                                                   | ✓C                                     | ✓                         | ✓                       |                                    | ✓C                            | ✓C                     |                                    | ✓                      | ✓C                                 |
| 8               | +              | ✓                                                 | ✓C                                     | ✓(C)                      | ✓                       |                                    | ✓C                            | ✓C                     | ✓C                                 | ✓                      | ✓C                                 |
| 9               | +              | ✓(C)                                              | ✓C                                     | ✓                         | ✓                       | ✓C                                 | ✓C                            | ✓C                     | ✓C                                 | ✓                      | ✓C                                 |
| 10              | +              | ✓                                                 |                                        | ✓(C)                      | ✓                       |                                    | ✓C                            | ✓C                     |                                    | ✓                      | ✓C                                 |
| 11              | +              | ✓                                                 | ✓C                                     | ✓                         | ✓                       | ✓C                                 | ✓C                            | ✓C                     | ✓C                                 | ✓                      | ✓C                                 |
| 12              | +              | ✓                                                 | ✓C                                     | ✓                         | ✓C                      | ✓C                                 | ✓C                            | ✓C                     | ✓C                                 | ✓                      | ✓C                                 |
| 13              | +              |                                                   |                                        | ✓(C)                      | ✓                       |                                    | ✓C                            | ✓(C)                   |                                    |                        | ✓C                                 |
| 14              | +              |                                                   | ✓C                                     | ✓                         |                         | ✓C                                 | ✓C                            | ✓C                     | ✓C                                 | ✓                      | ✓C                                 |
| 15              | +++            |                                                   |                                        | ✓(C)                      |                         |                                    |                               | ✓                      |                                    |                        |                                    |
| 16              | +              |                                                   | ✓C                                     | ✓(C)                      | ✓(C)                    | ✓C                                 | ✓C                            | ✓C                     | ✓C                                 | ✓                      | ✓C                                 |
| 17              | +              |                                                   | ✓C                                     | ✓                         |                         |                                    | ✓C                            |                        |                                    | ✓                      | ✓C                                 |
| 18              | +++            |                                                   | ✓C                                     | ✓C                        | ✓C                      |                                    | ✓C                            |                        | ✓C                                 |                        | ✓C                                 |
| 19              | +++            | ✓                                                 |                                        | ✓(C)                      | ✓(C)                    | ✓C                                 | ✓C                            | ✓(C)                   | ✓C                                 | ✓                      | ✓C                                 |
| 20              | +              | ✓C                                                |                                        | ✓                         |                         |                                    | ✓C                            | ✓C                     | ✓C                                 | ✓                      | ✓C                                 |
| 21              | +              | ✓                                                 |                                        | ✓(C)                      |                         |                                    | ✓C                            | ✓C                     |                                    | ✓                      | ✓C                                 |
| 22              | +++            |                                                   | ✓C                                     | ✓C                        |                         |                                    | ✓C                            | ✓C                     |                                    | ✓                      | ✓C                                 |
| 23              | +              | ✓                                                 |                                        | ✓(C)                      | ✓                       | ✓C                                 | ✓C                            | ✓C                     | ✓C                                 | ✓                      | ✓C                                 |
| 24              | +              | ✓                                                 | ✓C                                     | ✓(C)                      | ✓(C)                    |                                    | ✓C                            | ✓C                     |                                    | ✓                      | ✓C                                 |
| 25              | +              | ✓C                                                | ✓C                                     | ✓                         | ✓                       | ✓C                                 | ✓C                            | ✓C                     | ✓C                                 | ✓                      | ✓C                                 |
| 26              | ++             | ✓                                                 | ✓C                                     | ✓C                        | ✓C                      |                                    | ✓C                            | ✓C                     | ✓C                                 | ✓                      | ✓C                                 |
| 27              | +++            |                                                   |                                        | ✓                         | ✓                       |                                    | ✓C                            | ✓(C)                   |                                    | ✓                      | ✓C                                 |
| 28              | +++            |                                                   |                                        | ✓                         |                         |                                    | ✓C                            | ✓C                     |                                    |                        |                                    |
| 29              | +++            |                                                   |                                        | ✓                         |                         |                                    | ✓C                            | ✓C                     |                                    |                        |                                    |
| 30              | +++            | ✓                                                 |                                        | ✓                         | ✓                       |                                    | ✓C                            |                        |                                    | ✓                      | ✓C                                 |
| 31              | +              |                                                   |                                        | ✓                         | ✓                       |                                    | ✓C                            | ✓C                     |                                    | ✓                      | ✓C                                 |
| 32              | +              |                                                   |                                        | ✓                         |                         |                                    | ✓C                            | ✓C                     |                                    | ✓                      |                                    |
| 33              | +++            |                                                   |                                        | ✓                         |                         |                                    |                               | ✓C                     |                                    |                        |                                    |
| 34              | +++            |                                                   |                                        | ✓C                        | ✓(C)                    |                                    | ✓C                            | ✓C                     |                                    | ✓                      | ✓C                                 |
| 35              | +              | ✓(C/S)                                            | ✓C                                     | ✓                         | ✓                       |                                    | ✓C                            | ✓C                     |                                    | ✓                      | ✓C                                 |
| 36              | +++            | ✓                                                 |                                        |                           |                         |                                    |                               |                        |                                    | ✓                      |                                    |
| 37              | +++            | ✓                                                 |                                        | ✓                         | ✓                       |                                    |                               |                        |                                    | ✓                      |                                    |
| 38              | +++            | ✓(C)                                              |                                        |                           |                         |                                    |                               | ✓C                     |                                    |                        | ✓C                                 |
| 39              | +++            | ✓(C)                                              |                                        |                           |                         |                                    |                               |                        |                                    |                        | ✓C                                 |
| 40              | +++            |                                                   |                                        |                           |                         |                                    |                               |                        |                                    | ✓                      |                                    |
| 41              | +++            |                                                   |                                        |                           |                         |                                    |                               |                        |                                    |                        |                                    |
| 42              | +++            |                                                   |                                        |                           |                         |                                    |                               |                        |                                    |                        |                                    |
| 43              | +++            |                                                   |                                        |                           |                         |                                    |                               |                        |                                    |                        |                                    |
| 44              | +++            |                                                   |                                        |                           |                         |                                    |                               |                        |                                    |                        |                                    |
| 45              | +++            | ✓                                                 |                                        | ✓C                        | ✓                       |                                    |                               | ✓C                     |                                    | ✓                      | ✓C                                 |
| 46              | N/A            |                                                   |                                        | ✓C                        |                         |                                    |                               |                        |                                    |                        |                                    |
| 47              | N/A            |                                                   |                                        |                           |                         |                                    |                               |                        |                                    |                        |                                    |
| 48              | N/A            |                                                   | ✓C                                     |                           | ✓C                      | ✓C                                 | ✓C                            | ✓C                     |                                    |                        |                                    |

## Appendix 3. Curricula keyword search & domain mapping

| Key Word<br>Search Terms & Domains                       | Foundation & Core Training |                   |                      |                       |                          |                        |
|----------------------------------------------------------|----------------------------|-------------------|----------------------|-----------------------|--------------------------|------------------------|
|                                                          | Foundation Program         | Acute Common Stem | Broad Based Training | Core Medical Training | Core Psychiatry Training | Core Surgical Training |
| Informatic                                               |                            |                   |                      |                       |                          |                        |
| Technolog                                                | ✓                          | ✓                 | ✓                    | ✓                     | ✓                        |                        |
| IT system                                                | ✓                          | ✓                 |                      | ✓                     |                          |                        |
| Electronic [health/ clinical/<br>medical/patient] record | ✓                          |                   |                      |                       |                          |                        |
| eHealth/e-Health                                         |                            |                   |                      |                       |                          |                        |
| 1                                                        |                            |                   |                      |                       |                          |                        |
| 2                                                        |                            |                   |                      |                       |                          |                        |
| 3                                                        | x                          | x                 | x                    | x                     |                          |                        |
| 4                                                        | x                          | x                 | x                    | x                     | x                        |                        |
| 5                                                        |                            |                   |                      |                       |                          |                        |
| 6                                                        |                            | x                 |                      | x                     |                          |                        |
| 7                                                        |                            |                   |                      |                       |                          |                        |
| 8                                                        |                            |                   |                      |                       |                          |                        |
| 9                                                        |                            |                   |                      |                       |                          |                        |
| 10                                                       |                            |                   |                      |                       |                          |                        |
| 11                                                       |                            | x                 |                      | x                     |                          |                        |
| 12                                                       |                            |                   |                      |                       |                          |                        |
| 13                                                       |                            |                   |                      |                       |                          |                        |
| 14                                                       |                            |                   |                      |                       |                          |                        |
| 15                                                       |                            |                   |                      |                       |                          |                        |
| 16                                                       | x                          |                   |                      |                       |                          |                        |
| 17                                                       |                            |                   |                      |                       |                          |                        |
| 18                                                       |                            |                   |                      |                       |                          |                        |
| 19                                                       |                            |                   |                      |                       |                          |                        |
| 20                                                       |                            |                   |                      |                       |                          |                        |
| 21                                                       |                            |                   |                      |                       |                          |                        |
| 22                                                       |                            |                   |                      |                       |                          |                        |
| 23                                                       |                            |                   |                      |                       |                          |                        |
| 24                                                       |                            | x                 |                      | x                     |                          |                        |
| 25                                                       |                            |                   |                      |                       |                          |                        |
| 26                                                       | x                          | x                 | x                    | x                     | x                        |                        |
| 27                                                       |                            |                   |                      |                       |                          |                        |
| 28                                                       |                            |                   |                      |                       |                          |                        |
| 29                                                       |                            |                   |                      |                       |                          |                        |
| 30                                                       |                            |                   |                      |                       |                          |                        |
| 31                                                       |                            |                   |                      |                       |                          |                        |
| 32                                                       |                            |                   |                      |                       |                          |                        |
| 33                                                       |                            |                   |                      |                       |                          |                        |
| 34                                                       |                            |                   |                      |                       |                          |                        |
| 35                                                       |                            |                   |                      |                       |                          |                        |
| 36                                                       |                            |                   |                      |                       |                          |                        |
| 37                                                       |                            |                   |                      |                       |                          |                        |
| 38                                                       |                            |                   |                      |                       |                          |                        |
| 39                                                       |                            |                   |                      |                       |                          |                        |
| 40                                                       |                            |                   |                      |                       |                          |                        |
| 41                                                       |                            |                   |                      |                       |                          |                        |
| 42                                                       |                            |                   |                      |                       |                          |                        |
| 43                                                       |                            |                   |                      |                       |                          |                        |
| 44                                                       |                            |                   |                      |                       |                          |                        |
| 45                                                       |                            |                   |                      |                       |                          |                        |
| 46                                                       |                            |                   |                      |                       |                          |                        |
| 47                                                       |                            |                   |                      |                       |                          |                        |
| 48                                                       |                            |                   |                      |                       |                          |                        |
| 49                                                       |                            | x                 |                      | x                     |                          |                        |
| 50                                                       |                            |                   |                      |                       |                          |                        |
| Total No. Domains Mapped                                 | 4                          | 7                 | 3                    | 7                     | 2                        | 0                      |

# Medicine

| Key Word<br>Search Terms & Domains                       | Acute Internal<br>Medicine | Allergy | Audio-<br>Vestibular | Aviation &<br>Space | Cardiology | Clinical<br>Genetics | Clinical<br>Neurophysiology | Clinical Pharmacology &<br>Therapeutics | Dermatology | Endocrinology & Diabetes | Gastroenterology |
|----------------------------------------------------------|----------------------------|---------|----------------------|---------------------|------------|----------------------|-----------------------------|-----------------------------------------|-------------|--------------------------|------------------|
| Informatic                                               |                            |         |                      |                     |            | ✓                    |                             |                                         |             |                          |                  |
| Technology                                               | ✓                          | ✓       | ✓                    | ✓                   | ✓          | ✓                    | ✓                           | ✓                                       | ✓           | ✓                        | ✓                |
| IT system                                                | ✓                          | ✓       | ✓                    |                     | ✓          |                      |                             | ✓                                       | ✓           | ✓                        | ✓                |
| Electronic [health/ clinical/<br>medical/patient] record |                            | ✓       |                      |                     |            | ✓                    |                             | ✓                                       | ✓           | ✓                        | ✓                |
| eHealth/e-Health                                         |                            |         |                      |                     |            |                      |                             |                                         |             |                          |                  |
| 1                                                        |                            |         |                      |                     |            |                      |                             |                                         |             |                          |                  |
| 2                                                        |                            |         |                      |                     |            |                      |                             |                                         |             |                          |                  |
| 3                                                        | x                          | x       | x                    | x                   | x          | x                    | x                           | x                                       | x           | x                        | x                |
| 4                                                        | x                          | x       | x                    | x                   | x          | x                    |                             | x                                       | x           | x                        | x                |
| 5                                                        |                            |         |                      |                     |            | x                    |                             |                                         |             |                          |                  |
| 6                                                        | x                          | x       | x                    |                     | x          | x                    |                             | x                                       | x           | x                        | x                |
| 7                                                        |                            |         |                      |                     |            |                      |                             |                                         |             |                          |                  |
| 8                                                        |                            |         |                      |                     |            |                      | x                           |                                         |             |                          |                  |
| 9                                                        |                            |         |                      |                     |            |                      |                             |                                         |             |                          |                  |
| 10                                                       |                            |         |                      |                     |            |                      |                             |                                         |             | x                        |                  |
| 11                                                       | x                          | x       | x                    | x                   | x          | x                    |                             | x                                       | x           | x                        | x                |
| 12                                                       |                            |         |                      | x                   |            | x                    |                             |                                         |             |                          |                  |
| 13                                                       |                            |         |                      |                     |            |                      |                             |                                         |             |                          |                  |
| 14                                                       |                            |         |                      |                     |            |                      |                             |                                         |             |                          |                  |
| 15                                                       |                            |         |                      |                     |            |                      |                             |                                         |             |                          |                  |
| 16                                                       |                            |         | x                    | x                   |            |                      |                             |                                         |             |                          |                  |
| 17                                                       |                            |         |                      |                     |            |                      |                             |                                         |             |                          |                  |
| 18                                                       |                            |         |                      |                     |            |                      |                             |                                         |             |                          |                  |
| 19                                                       |                            |         |                      |                     |            |                      |                             |                                         |             |                          |                  |
| 20                                                       |                            |         |                      |                     |            |                      |                             |                                         |             |                          |                  |
| 21                                                       |                            |         |                      |                     |            |                      |                             |                                         |             |                          |                  |
| 22                                                       |                            |         |                      |                     |            |                      |                             |                                         |             |                          |                  |
| 23                                                       |                            |         |                      | x                   |            | x                    |                             |                                         |             |                          |                  |
| 24                                                       | x                          | x       | x                    |                     | x          |                      |                             | x                                       | x           | x                        | x                |
| 25                                                       |                            |         |                      |                     |            |                      |                             |                                         |             |                          |                  |
| 26                                                       | x                          | x       | x                    | x                   | x          | x                    | x                           | x                                       | x           | x                        | x                |
| 27                                                       |                            |         |                      |                     |            |                      |                             |                                         |             |                          |                  |
| 28                                                       |                            |         |                      |                     |            |                      |                             |                                         |             |                          |                  |
| 29                                                       |                            |         |                      | x                   |            |                      |                             |                                         |             |                          |                  |
| 30                                                       |                            |         |                      |                     |            |                      |                             |                                         |             |                          |                  |
| 31                                                       |                            |         |                      |                     |            |                      |                             |                                         |             |                          |                  |
| 32                                                       |                            |         |                      |                     |            |                      |                             |                                         |             |                          |                  |
| 33                                                       |                            |         |                      |                     |            |                      |                             |                                         |             |                          |                  |
| 34                                                       |                            |         |                      |                     |            |                      |                             |                                         |             |                          |                  |
| 35                                                       |                            |         |                      |                     |            |                      |                             |                                         |             |                          |                  |
| 36                                                       |                            |         |                      |                     |            |                      |                             |                                         |             |                          |                  |
| 37                                                       |                            |         |                      |                     |            |                      |                             |                                         |             |                          |                  |
| 38                                                       |                            |         |                      |                     |            |                      |                             |                                         |             |                          |                  |
| 39                                                       |                            |         |                      |                     |            |                      |                             |                                         |             |                          |                  |
| 40                                                       |                            |         |                      |                     |            |                      |                             |                                         |             |                          |                  |
| 41                                                       |                            |         |                      |                     |            |                      |                             |                                         |             |                          |                  |
| 42                                                       |                            |         |                      |                     |            |                      |                             |                                         |             |                          |                  |
| 43                                                       |                            |         |                      |                     |            |                      |                             |                                         |             |                          |                  |
| 44                                                       |                            |         |                      |                     |            |                      |                             |                                         |             |                          |                  |
| 45                                                       |                            |         |                      |                     |            |                      |                             |                                         |             |                          |                  |
| 46                                                       |                            |         |                      |                     |            |                      |                             |                                         |             |                          |                  |
| 47                                                       |                            |         |                      |                     |            |                      |                             |                                         |             |                          |                  |
| 48                                                       |                            |         |                      | x                   |            | x                    | x                           |                                         |             |                          |                  |
| 49                                                       | x                          | x       | x                    | x                   | x          | x                    |                             | x                                       | x           |                          | x                |
| 50                                                       |                            |         | x                    | x                   |            | x                    |                             |                                         |             |                          |                  |
| Total No. Domains Mapped                                 | 7                          | 7       | 9                    | 11                  | 7          | 11                   | 4                           | 7                                       | 7           | 7                        | 7                |



| Medicine                                              |                           |                |            |             |            |                     |                  |                       |           |
|-------------------------------------------------------|---------------------------|----------------|------------|-------------|------------|---------------------|------------------|-----------------------|-----------|
| Key Word<br>Search Terms & Domains                    | General Internal Medicine | Genito-Urinary | Geriatrics | Haematology | Immunology | Infectious Diseases | Medical Oncology | Medical Ophthalmology | Neurology |
| Informatic                                            |                           |                |            |             |            |                     |                  |                       | ✓         |
| Technolog                                             | ✓                         | ✓              | ✓          | ✓           | ✓          | ✓                   | ✓                |                       |           |
| IT system                                             | ✓                         |                |            | ✓           | ✓          | ✓                   |                  | ✓                     | ✓         |
| Electronic [health/ clinical/ medical/patient] record | ✓                         |                |            | ✓           | ✓          |                     |                  | ✓                     |           |
| eHealth/e-Health                                      |                           |                |            |             |            |                     |                  |                       |           |
| 1                                                     |                           |                |            |             |            |                     |                  |                       |           |
| 2                                                     |                           |                |            |             |            |                     | x                |                       |           |
| 3                                                     | x                         | x              |            | x           | x          | x                   | x                | x                     | x         |
| 4                                                     | x                         |                |            | x           | x          | x                   | x                | x                     |           |
| 5                                                     |                           | x              |            |             |            |                     | x                |                       |           |
| 6                                                     | x                         |                |            | x           | x          | x                   |                  | x                     |           |
| 7                                                     |                           |                |            |             |            |                     |                  |                       |           |
| 8                                                     |                           |                |            |             |            |                     | x                |                       |           |
| 9                                                     |                           |                |            |             |            |                     |                  |                       |           |
| 10                                                    | x                         |                |            |             |            |                     | x                |                       |           |
| 11                                                    | x                         | x              |            | x           | x          | x                   |                  | x                     |           |
| 12                                                    |                           |                |            |             |            |                     | x                |                       |           |
| 13                                                    |                           |                |            |             |            |                     |                  |                       |           |
| 14                                                    |                           | x              |            |             |            |                     | x                |                       |           |
| 15                                                    |                           |                |            |             |            |                     |                  |                       |           |
| 16                                                    |                           |                |            |             |            |                     | x                |                       | x         |
| 17                                                    |                           |                |            |             |            |                     |                  |                       |           |
| 18                                                    |                           |                |            |             |            |                     |                  |                       |           |
| 19                                                    |                           |                |            |             |            |                     | x                |                       |           |
| 20                                                    |                           |                |            |             |            |                     |                  |                       |           |
| 21                                                    | x                         |                |            |             |            |                     |                  |                       |           |
| 22                                                    |                           |                |            |             |            |                     | x                |                       |           |
| 23                                                    | x                         |                |            |             |            |                     | x                |                       | x         |
| 24                                                    | x                         |                |            | x           | x          |                     |                  | x                     |           |
| 25                                                    |                           |                |            |             |            |                     |                  |                       |           |
| 26                                                    | x                         | x              | x          | x           | x          | x                   | x                | x                     |           |
| 27                                                    |                           |                |            |             |            |                     |                  |                       |           |
| 28                                                    |                           |                |            |             |            |                     |                  |                       |           |
| 29                                                    |                           |                |            |             |            |                     |                  |                       |           |
| 30                                                    |                           |                |            |             |            |                     |                  |                       |           |
| 31                                                    |                           |                |            |             |            |                     |                  |                       |           |
| 32                                                    |                           |                |            |             |            |                     |                  |                       |           |
| 33                                                    |                           |                |            |             |            |                     |                  |                       |           |
| 34                                                    |                           |                |            |             |            |                     |                  |                       |           |
| 35                                                    |                           |                |            |             |            |                     |                  |                       |           |
| 36                                                    |                           |                |            |             |            |                     |                  |                       |           |
| 37                                                    |                           |                |            |             |            |                     |                  |                       |           |
| 38                                                    |                           |                |            |             |            |                     |                  |                       |           |
| 39                                                    |                           |                |            |             |            |                     |                  |                       |           |
| 40                                                    |                           |                | x          |             |            |                     |                  |                       |           |
| 41                                                    |                           |                |            |             |            |                     |                  |                       |           |
| 42                                                    |                           |                |            |             |            |                     |                  |                       |           |
| 43                                                    |                           |                |            |             |            |                     |                  |                       |           |
| 44                                                    |                           |                |            |             |            |                     |                  |                       |           |
| 45                                                    |                           |                |            |             |            |                     |                  |                       |           |
| 46                                                    |                           |                |            |             |            |                     |                  |                       |           |
| 47                                                    |                           |                |            |             |            |                     |                  |                       |           |
| 48                                                    |                           |                |            |             |            |                     |                  |                       |           |
| 49                                                    | x                         |                | x          | x           | x          |                     |                  | x                     |           |
| 50                                                    | x                         |                | x          |             |            | x                   | x                |                       |           |
| Total No. Domains Mapped                              | 11                        | 5              | 4          | 7           | 7          | 6                   | 14               | 7                     | 3         |

| Medicine                                              |                  |                       |            |                |       |             |              |                  |          |
|-------------------------------------------------------|------------------|-----------------------|------------|----------------|-------|-------------|--------------|------------------|----------|
| Key Word<br>Search Terms & Domains                    | Nuclear Medicine | Paediatric Cardiology | Palliative | Rehabilitation | Renal | Respiratory | Rheumatology | Sport & Exercise | Tropical |
| Informatic                                            |                  |                       |            |                | ✓     |             |              |                  |          |
| Technolog                                             | ✓                | ✓                     |            | ✓              | ✓     | ✓           | ✓            | ✓                | ✓        |
| IT system                                             |                  |                       | ✓          |                | ✓     | ✓           | ✓            | ✓                | ✓        |
| Electronic [health/ clinical/ medical/patient] record |                  |                       | ✓          |                |       | ✓           |              | ✓                |          |
| eHealth/e-Health                                      |                  |                       |            |                |       |             |              |                  |          |
| 1                                                     |                  |                       |            |                |       |             |              |                  |          |
| 2                                                     |                  | x                     |            |                |       |             |              |                  |          |
| 3                                                     |                  | x                     | x          | x              | x     | x           | x            | x                | x        |
| 4                                                     |                  | x                     | x          |                | x     | x           | x            | x                | x        |
| 5                                                     |                  |                       |            |                | x     |             | x            |                  |          |
| 6                                                     |                  |                       | x          |                | x     | x           | x            | x                | x        |
| 7                                                     |                  |                       |            |                |       |             |              |                  |          |
| 8                                                     |                  |                       |            | x              | x     |             |              |                  |          |
| 9                                                     |                  |                       |            |                |       |             |              |                  |          |
| 10                                                    |                  |                       |            |                |       |             |              |                  |          |
| 11                                                    |                  |                       | x          |                | x     | x           | x            | x                | x        |
| 12                                                    |                  |                       |            |                |       |             |              |                  |          |
| 13                                                    |                  |                       |            |                |       |             |              |                  |          |
| 14                                                    |                  | x                     |            |                | x     |             | x            |                  |          |
| 15                                                    |                  |                       |            |                |       |             |              |                  |          |
| 16                                                    |                  | x                     |            |                |       |             | x            |                  |          |
| 17                                                    |                  |                       |            |                |       |             |              |                  |          |
| 18                                                    |                  |                       |            |                |       |             |              |                  |          |
| 19                                                    |                  | x                     |            |                |       |             |              |                  |          |
| 20                                                    |                  |                       |            |                |       |             |              |                  |          |
| 21                                                    |                  |                       |            |                | x     |             |              |                  |          |
| 22                                                    |                  |                       |            |                | x     |             |              |                  |          |
| 23                                                    |                  | x                     |            |                | x     |             | x            |                  |          |
| 24                                                    |                  |                       | x          | x              | x     | x           | x            | x                |          |
| 25                                                    |                  |                       |            |                |       |             |              |                  |          |
| 26                                                    |                  | x                     | x          |                | x     | x           | x            | x                | x        |
| 27                                                    |                  |                       |            |                |       |             |              |                  |          |
| 28                                                    |                  |                       |            |                |       |             |              |                  |          |
| 29                                                    |                  |                       |            |                |       |             |              |                  |          |
| 30                                                    |                  |                       |            |                |       |             |              |                  |          |
| 31                                                    |                  | x                     |            |                |       |             | x            |                  |          |
| 32                                                    |                  |                       |            |                |       |             |              |                  |          |
| 33                                                    |                  |                       |            |                |       |             |              |                  |          |
| 34                                                    |                  |                       |            |                |       |             |              |                  |          |
| 35                                                    |                  |                       |            |                |       |             |              |                  |          |
| 36                                                    |                  |                       |            |                |       |             |              |                  |          |
| 37                                                    |                  |                       |            |                |       |             |              |                  |          |
| 38                                                    |                  |                       |            |                |       |             |              |                  |          |
| 39                                                    |                  |                       |            |                |       |             |              |                  |          |
| 40                                                    |                  |                       |            | x              |       |             |              |                  |          |
| 41                                                    |                  |                       |            |                |       |             |              |                  |          |
| 42                                                    |                  |                       |            |                |       |             |              |                  |          |
| 43                                                    |                  |                       |            |                |       |             |              |                  |          |
| 44                                                    |                  |                       |            |                |       |             |              |                  |          |
| 45                                                    |                  |                       |            |                |       |             |              |                  |          |
| 46                                                    |                  |                       |            |                |       |             |              |                  |          |
| 47                                                    |                  |                       |            |                |       |             |              |                  |          |
| 48                                                    |                  | x                     |            |                |       |             | x            |                  |          |
| 49                                                    | x                |                       | x          |                | x     | x           | x            | x                |          |
| 50                                                    |                  | x                     | x          |                |       |             | x            | x                | x        |
| Total No. Domains Mapped                              | 1                | 11                    | 8          | 4              | 13    | 7           | 14           | 8                | 6        |

| Surgery                                               |                |         |            |         |              |                      |                |                      |         |          |
|-------------------------------------------------------|----------------|---------|------------|---------|--------------|----------------------|----------------|----------------------|---------|----------|
| Key Word<br>Search Terms & Domains                    | Cardiothoracic | General | Paediatric | Plastic | Neurosurgery | Oral & Maxillofacial | Otolaryngology | Trauma & Orthopaedic | Urology | Vascular |
| Informatic                                            |                |         |            |         |              |                      |                |                      |         |          |
| Technolog                                             | ✓              | ✓       | ✓          | ✓       | ✓            | ✓                    | ✓              | ✓                    | ✓       | ✓        |
| IT system                                             |                |         |            |         |              |                      |                |                      |         |          |
| Electronic [health/ clinical/ medical/patient] record |                |         |            |         |              |                      |                |                      |         |          |
| eHealth/e-Health                                      |                |         |            |         |              |                      |                |                      |         |          |
| 1                                                     |                |         |            |         |              |                      |                |                      |         |          |
| 2                                                     |                |         |            |         |              |                      |                |                      |         |          |
| 3                                                     |                |         |            |         |              |                      |                |                      |         |          |
| 4                                                     |                |         |            |         |              |                      |                |                      |         |          |
| 5                                                     |                |         |            |         |              |                      |                |                      |         |          |
| 6                                                     |                |         |            |         |              |                      |                |                      |         |          |
| 7                                                     |                |         |            |         |              |                      |                |                      |         |          |
| 8                                                     |                |         |            |         |              |                      |                |                      |         |          |
| 9                                                     |                |         |            |         |              |                      |                |                      |         |          |
| 10                                                    |                |         |            |         |              |                      |                |                      |         |          |
| 11                                                    |                |         |            |         |              |                      |                |                      |         |          |
| 12                                                    |                |         |            |         |              |                      |                |                      |         |          |
| 13                                                    |                |         |            |         |              |                      |                |                      |         |          |
| 14                                                    |                |         |            |         |              |                      |                |                      |         |          |
| 15                                                    |                |         |            |         |              |                      |                |                      |         |          |
| 16                                                    |                |         |            |         |              |                      |                |                      |         |          |
| 17                                                    |                |         |            |         |              |                      |                |                      |         |          |
| 18                                                    |                |         |            |         |              |                      |                |                      |         |          |
| 19                                                    |                |         |            |         |              |                      |                |                      |         |          |
| 20                                                    |                |         |            |         |              |                      |                |                      |         |          |
| 21                                                    |                |         |            |         |              |                      |                |                      |         |          |
| 22                                                    |                |         |            |         |              |                      |                |                      |         |          |
| 23                                                    |                |         |            |         |              |                      |                |                      |         |          |
| 24                                                    |                |         |            |         |              |                      |                |                      |         |          |
| 25                                                    |                |         |            |         |              |                      |                |                      |         |          |
| 26                                                    |                |         |            |         |              |                      |                |                      |         |          |
| 27                                                    |                |         |            |         |              |                      |                |                      |         |          |
| 28                                                    |                |         |            |         |              |                      |                |                      |         |          |
| 29                                                    |                |         |            |         |              |                      |                |                      |         |          |
| 30                                                    |                |         |            |         |              |                      |                |                      |         |          |
| 31                                                    |                |         |            |         |              |                      |                |                      |         |          |
| 32                                                    |                |         |            |         |              |                      |                |                      |         |          |
| 33                                                    |                |         |            |         |              |                      |                |                      |         |          |
| 34                                                    |                |         |            |         |              |                      |                |                      |         |          |
| 35                                                    |                |         |            |         |              |                      |                |                      |         |          |
| 36                                                    |                |         |            |         |              |                      |                |                      |         |          |
| 37                                                    |                |         |            |         |              |                      |                |                      |         |          |
| 38                                                    |                |         |            |         |              |                      |                |                      |         |          |
| 39                                                    |                |         |            |         |              |                      |                |                      |         |          |
| 40                                                    |                |         |            |         |              |                      |                |                      |         |          |
| 41                                                    |                |         |            |         |              |                      |                |                      |         |          |
| 42                                                    |                |         |            |         |              |                      |                |                      |         |          |
| 43                                                    |                |         |            |         |              |                      |                |                      |         |          |
| 44                                                    |                |         |            |         |              |                      |                |                      |         |          |
| 45                                                    |                |         |            |         |              |                      |                |                      |         |          |
| 46                                                    |                |         |            |         |              |                      |                |                      |         |          |
| 47                                                    |                |         |            |         |              |                      |                |                      |         |          |
| 48                                                    |                |         |            |         |              |                      |                |                      |         |          |
| 49                                                    | x              | x       | x          | x       | x            | x                    | x              | x                    | x       | x        |
| 50                                                    |                |         |            |         |              |                      |                | x                    |         |          |
| Total No. Domains Mapped                              | 1              | 1       | 1          | 1       | 1            | 1                    | 1              | 2                    | 1       | 1        |

|                                                       | Anaesthetics |                | Pathology |                        |                           |                         |                | Psychiatry         |          |         |                     |                       | Radiology |                   |                    |
|-------------------------------------------------------|--------------|----------------|-----------|------------------------|---------------------------|-------------------------|----------------|--------------------|----------|---------|---------------------|-----------------------|-----------|-------------------|--------------------|
| Key Word Search Terms & Domains                       | Anaesthetics | Intensive Care | Chemical  | Paediatric & Perinatal | Diagnostic Neuropathology | Forensic Histopathology | Histopathology | Child & Adolescent | Forensic | General | Learning Disability | Medical Psychotherapy | Old Age   | Clinical Oncology | Clinical Radiology |
| Informatic                                            | ✓            |                |           | ✓                      | ✓                         | ✓                       | ✓              |                    |          |         |                     |                       |           |                   | ✓                  |
| Technolog                                             | ✓            | ✓              | ✓         | ✓                      | ✓                         | ✓                       | ✓              |                    | ✓        | ✓       | ✓                   | ✓                     | ✓         | ✓                 | ✓                  |
| IT system                                             | ✓            | ✓              | ✓         |                        |                           |                         | ✓              |                    |          |         |                     |                       |           |                   | ✓                  |
| Electronic [health/ clinical/ medical/patient] record | ✓            |                | ✓         |                        |                           |                         |                |                    |          |         |                     |                       |           | ✓                 | ✓                  |
| eHealth/e-Health                                      |              |                |           |                        |                           |                         |                |                    |          |         |                     |                       |           |                   |                    |
| 1                                                     |              |                |           |                        |                           |                         |                |                    |          |         |                     |                       |           |                   |                    |
| 2                                                     |              |                |           |                        |                           |                         |                |                    |          |         |                     |                       |           |                   |                    |
| 3                                                     | x            | x              | x         | x                      | x                         | X                       | x              |                    |          |         |                     |                       |           | x                 | x                  |
| 4                                                     | x            | x              | x         | x                      | x                         | X                       | x              |                    | x        | x       | x                   | x                     | x         | x                 | x                  |
| 5                                                     |              |                | x         | x                      | x                         | X                       | x              |                    |          |         |                     |                       |           |                   |                    |
| 6                                                     | x            | x              | x         |                        |                           |                         | x              |                    |          |         |                     |                       |           | x                 | x                  |
| 7                                                     |              |                |           |                        |                           |                         |                |                    |          |         |                     |                       |           |                   |                    |
| 8                                                     |              |                |           | x                      | x                         | x                       | x              |                    |          |         |                     |                       |           |                   |                    |
| 9                                                     | x            |                | x         |                        |                           |                         |                |                    |          |         |                     |                       |           |                   |                    |
| 10                                                    |              |                | x         |                        |                           |                         |                |                    |          |         |                     |                       |           |                   |                    |
| 11                                                    | x            | x              | x         | x                      | x                         | x                       | x              |                    |          |         |                     |                       |           | x                 | x                  |
| 12                                                    | x            |                |           |                        |                           |                         |                |                    |          |         |                     |                       |           |                   |                    |
| 13                                                    |              |                |           |                        |                           |                         |                |                    |          |         |                     |                       |           |                   |                    |
| 14                                                    | x            |                |           | x                      | x                         | x                       | x              |                    |          |         |                     |                       |           |                   |                    |
| 15                                                    |              |                |           |                        |                           |                         |                |                    |          |         |                     |                       |           |                   |                    |
| 16                                                    | x            |                | x         | x                      | x                         | x                       | x              |                    |          |         |                     |                       |           |                   | x                  |
| 17                                                    |              |                |           |                        |                           |                         |                |                    |          |         |                     |                       |           |                   |                    |
| 18                                                    | x            | x              |           | x                      | x                         |                         | x              |                    |          |         |                     |                       |           |                   |                    |
| 19                                                    |              |                |           |                        |                           |                         |                |                    |          |         |                     |                       |           |                   |                    |
| 20                                                    |              |                |           |                        |                           |                         |                |                    |          |         |                     |                       |           |                   |                    |
| 21                                                    |              |                | x         |                        |                           |                         |                |                    |          |         |                     |                       |           |                   |                    |
| 22                                                    | x            |                |           |                        |                           |                         |                |                    |          |         |                     |                       |           |                   |                    |
| 23                                                    | x            |                | x         | x                      | x                         | x                       | x              |                    |          |         |                     |                       |           |                   |                    |
| 24                                                    | x            | x              | x         |                        |                           |                         |                |                    |          |         |                     |                       |           |                   | x                  |
| 25                                                    |              |                |           |                        |                           |                         |                |                    |          |         |                     |                       |           |                   |                    |
| 26                                                    | x            | x              | x         | x                      | x                         | x                       | x              |                    | x        | x       | x                   | x                     | x         | x                 | x                  |
| 27                                                    |              |                |           |                        |                           |                         |                |                    |          |         |                     |                       |           |                   |                    |
| 28                                                    |              |                |           |                        |                           |                         |                |                    |          |         |                     |                       |           |                   |                    |
| 29                                                    |              |                |           |                        |                           |                         |                |                    |          |         |                     |                       |           |                   |                    |
| 30                                                    |              |                |           |                        |                           |                         |                |                    |          |         |                     |                       |           |                   |                    |
| 31                                                    |              |                |           | x                      |                           |                         |                |                    |          |         |                     |                       |           |                   |                    |
| 32                                                    |              |                |           |                        |                           |                         |                |                    |          |         |                     |                       |           |                   |                    |
| 33                                                    |              |                |           |                        |                           |                         |                |                    |          |         |                     |                       |           |                   |                    |
| 34                                                    |              |                |           |                        |                           |                         |                |                    |          |         |                     |                       |           |                   |                    |
| 35                                                    | x            |                |           |                        |                           |                         |                |                    |          |         |                     |                       |           |                   |                    |
| 36                                                    |              |                | x         | x                      |                           |                         |                |                    |          |         |                     |                       |           |                   |                    |
| 37                                                    |              |                |           |                        |                           |                         |                |                    |          |         |                     |                       |           |                   |                    |
| 38                                                    |              |                |           | x                      | x                         | x                       | x              |                    |          |         |                     |                       |           |                   | x                  |
| 39                                                    |              |                |           |                        |                           |                         |                |                    |          |         |                     |                       |           |                   |                    |
| 40                                                    |              |                |           |                        |                           |                         |                |                    |          |         |                     |                       |           |                   |                    |
| 41                                                    |              |                |           |                        |                           |                         |                |                    |          |         |                     |                       |           |                   |                    |
| 42                                                    |              |                |           |                        |                           |                         |                |                    |          |         |                     |                       |           |                   |                    |
| 43                                                    |              |                |           |                        |                           |                         |                |                    |          |         |                     |                       |           |                   |                    |
| 44                                                    |              |                |           |                        |                           |                         |                |                    |          |         |                     |                       |           |                   |                    |
| 45                                                    |              |                |           |                        |                           |                         |                |                    |          |         |                     |                       |           |                   |                    |
| 46                                                    |              |                |           |                        |                           |                         |                |                    |          |         |                     |                       |           |                   |                    |
| 47                                                    |              |                |           |                        |                           |                         |                |                    |          |         |                     |                       |           |                   |                    |
| 48                                                    |              |                |           |                        |                           |                         |                |                    |          |         |                     |                       |           |                   |                    |
| 49                                                    | x            | x              | x         | x                      | x                         | x                       | x              |                    |          |         |                     |                       |           |                   | x                  |
| 50                                                    |              |                | x         | x                      | x                         | x                       | x              |                    |          |         |                     |                       |           |                   | x                  |
| Total No. Domains Mapped                              | 15           | 8              | 16        | 16                     | 14                        | 13                      | 15             | 0                  | 2        | 2       | 2                   | 2                     | 2         | 5                 | 10                 |

| Other                                                    |                                           |                       |                     |              |                             |                          |               |             |                            |                  |          |  |
|----------------------------------------------------------|-------------------------------------------|-----------------------|---------------------|--------------|-----------------------------|--------------------------|---------------|-------------|----------------------------|------------------|----------|--|
| Key Word<br>Search Terms & Domains                       | Community Sexual & Reproductive<br>Health | Emergency<br>Medicine | General<br>Practice | Microbiology | Obstetrics &<br>Gynaecology | Occupational<br>Medicine | Ophthalmology | Paediatrics | Pharmaceutical<br>Medicine | Public<br>Health | Virology |  |
| Informatic                                               |                                           |                       | ✓                   |              |                             |                          |               |             |                            |                  |          |  |
| Technolog                                                | ✓                                         | ✓                     | ✓                   | ✓            | ✓                           | ✓                        | ✓             | ✓           | ✓                          | ✓                | ✓        |  |
| IT system                                                |                                           | ✓                     | ✓                   | ✓            |                             |                          |               |             |                            |                  | ✓        |  |
| Electronic [health/ clinical/ medical/patient]<br>record |                                           |                       | ✓                   |              |                             |                          | ✓             |             |                            |                  |          |  |
| eHealth/e-Health                                         |                                           |                       |                     |              |                             |                          |               |             |                            |                  |          |  |
| 1                                                        |                                           |                       |                     |              | x                           | x                        |               |             |                            |                  |          |  |
| 2                                                        |                                           |                       |                     | x            |                             | x                        |               |             |                            | x                | x        |  |
| 3                                                        |                                           | x                     | x                   | x            | x                           | x                        | x             | x           |                            |                  | x        |  |
| 4                                                        |                                           | x                     | x                   | x            | x                           | x                        | x             | x           |                            |                  | x        |  |
| 5                                                        |                                           |                       | x                   |              | x                           |                          |               |             |                            |                  |          |  |
| 6                                                        |                                           | x                     | x                   | x            | x                           |                          |               |             |                            |                  | x        |  |
| 7                                                        |                                           |                       |                     |              |                             |                          |               |             |                            |                  |          |  |
| 8                                                        |                                           |                       | x                   |              |                             |                          | x             |             |                            |                  |          |  |
| 9                                                        |                                           |                       |                     |              |                             |                          |               |             |                            |                  |          |  |
| 10                                                       |                                           |                       |                     |              |                             |                          |               |             |                            |                  |          |  |
| 11                                                       |                                           | x                     | x                   | x            |                             |                          |               |             |                            |                  | x        |  |
| 12                                                       |                                           |                       |                     |              |                             |                          |               |             |                            |                  |          |  |
| 13                                                       |                                           |                       |                     |              |                             |                          |               |             |                            |                  |          |  |
| 14                                                       |                                           |                       |                     |              | x                           |                          | x             |             |                            | x                |          |  |
| 15                                                       |                                           |                       |                     |              |                             |                          |               |             |                            |                  |          |  |
| 16                                                       |                                           |                       | x                   |              | x                           | x                        |               |             |                            |                  |          |  |
| 17                                                       |                                           |                       |                     |              |                             |                          |               |             |                            |                  |          |  |
| 18                                                       |                                           |                       | x                   |              | x                           |                          |               |             |                            |                  |          |  |
| 19                                                       |                                           | x                     |                     |              |                             |                          |               |             |                            | x                |          |  |
| 20                                                       |                                           |                       |                     |              |                             |                          |               |             |                            |                  |          |  |
| 21                                                       |                                           |                       | x                   |              |                             |                          |               |             | x                          |                  |          |  |
| 22                                                       |                                           |                       | x                   |              |                             |                          |               |             |                            |                  |          |  |
| 23                                                       |                                           |                       | x                   |              | x                           | x                        |               |             |                            |                  |          |  |
| 24                                                       |                                           | x                     | x                   |              |                             |                          |               |             |                            |                  |          |  |
| 25                                                       |                                           |                       |                     |              |                             |                          |               |             |                            |                  |          |  |
| 26                                                       |                                           | x                     | x                   | x            | x                           | x                        | x             | x           |                            |                  | x        |  |
| 27                                                       |                                           |                       |                     |              |                             |                          |               |             |                            |                  |          |  |
| 28                                                       |                                           |                       |                     |              |                             |                          |               |             |                            |                  |          |  |
| 29                                                       |                                           |                       |                     |              |                             |                          |               |             |                            |                  |          |  |
| 30                                                       |                                           |                       |                     |              |                             |                          |               |             |                            |                  |          |  |
| 31                                                       |                                           |                       |                     |              |                             |                          |               |             |                            |                  | x        |  |
| 32                                                       |                                           |                       |                     |              |                             |                          |               |             |                            |                  |          |  |
| 33                                                       |                                           |                       |                     |              |                             |                          |               |             |                            |                  |          |  |
| 34                                                       |                                           |                       |                     |              |                             |                          |               |             |                            |                  |          |  |
| 35                                                       |                                           |                       | x                   |              |                             |                          |               |             |                            |                  |          |  |
| 36                                                       |                                           |                       |                     |              |                             |                          |               |             |                            |                  |          |  |
| 37                                                       |                                           |                       |                     |              |                             |                          |               |             |                            |                  |          |  |
| 38                                                       |                                           |                       |                     |              |                             |                          |               |             |                            |                  |          |  |
| 39                                                       |                                           |                       |                     |              |                             |                          |               |             |                            |                  |          |  |
| 40                                                       |                                           |                       |                     |              |                             |                          |               |             |                            |                  |          |  |
| 41                                                       |                                           |                       |                     |              |                             |                          |               |             |                            |                  |          |  |
| 42                                                       |                                           |                       |                     |              |                             |                          |               |             |                            |                  |          |  |
| 43                                                       |                                           |                       |                     |              |                             |                          |               |             |                            |                  |          |  |
| 44                                                       |                                           |                       |                     |              |                             |                          |               |             |                            |                  |          |  |
| 45                                                       |                                           |                       |                     |              |                             |                          |               |             |                            |                  |          |  |
| 46                                                       |                                           |                       |                     |              |                             |                          |               |             |                            |                  |          |  |
| 47                                                       |                                           |                       |                     |              |                             |                          |               |             |                            |                  |          |  |
| 48                                                       |                                           |                       | x                   |              |                             | x                        |               |             |                            |                  |          |  |
| 49                                                       |                                           | x                     |                     |              | x                           |                          |               |             |                            |                  |          |  |
| 50                                                       | x                                         | x                     |                     | x            | x                           | x                        |               |             |                            |                  | x        |  |
| Total No. Domains Mapped                                 | 1                                         | 9                     | 15                  | 7            | 12                          | 9                        | 5             | 3           | 1                          | 3                | 8        |  |
